# Supplementary material for: Kaposi's sarcoma herpesvirus (KSHV) microRNA K12-1 functions as an oncogene by activating NF-κB/IL-6/STAT3 signaling
Source: PubMed Central journal article supplement (PMC5078101; doi:10.18632/oncotarget.9221), 2016-05-07
Supplement: oncotarget-07-33363-s001.pdf [file oncotarget-07-33363-s001.pdf]

## SUPPLEMENTARY FIGURES AND TABLES

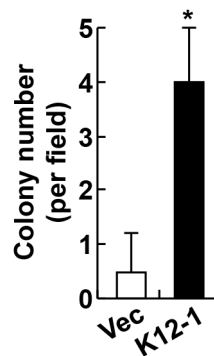

**Supplementary Figure S1: Colony numbers of the soft agar colony formation assays in Figure 1H.** Cell clusters of three or more cells are counted. Of note, in contrast to miR-K12-1 expressing Rat-1 cells which formed big colonies (Figure 1H), vector-expressing Rat-1 cells only formed small cell clusters of no more than 4 cells.

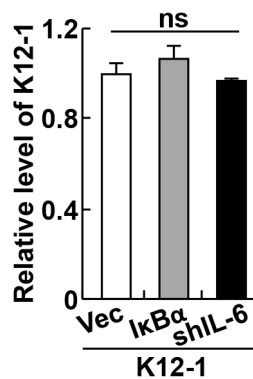

**Supplementary Figure S2: IkB $\alpha$  expression or IL-6 knockdown had no effect on the expression of transfected miR-K12-1 in Hela cells.** Real-time RT-PCR analysis was performed to examine the expression level of miR-K12-1 in Hela cells transfected with miR-K12-1 together with an empty vector, IkB $\alpha$ , or IL-6 shRNA.

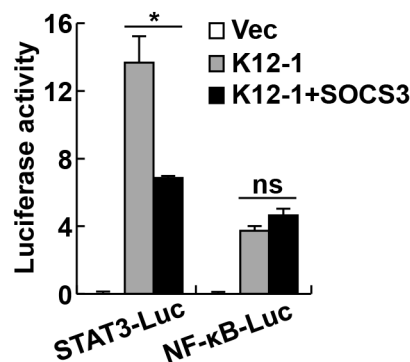

**Supplementary Figure S3: SOCS3 inhibits STAT3 but not NF- $\kappa$ B activation induced by miR-K12-1.** Luciferase assay was performed to measure STAT3 or NF- $\kappa$ B transcriptional activity in Hela cells transfected with an empty vector, miR-K12-1, or miR-K12-1 plus SOCS3, together with STAT3 or NF- $\kappa$ B luciferase reporter, respectively.

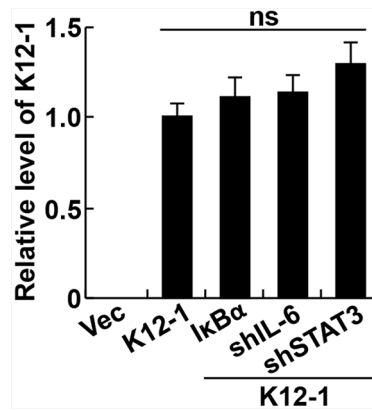

**Supplementary Figure S4: Expression of IkBa, or knockdown of IL-6 or STAT3, had no effect on the expression of miR-K12-1 in Rat-1 cells.** Real-time RT-PCR analysis was performed to examine the expression level of miR-K12-1 in Rat-1 cells stably expressing an empty vector, miR-K12-1, or miR-K12-1 together with IkBa, IL-6 shRNA, or STAT3 shRNA.

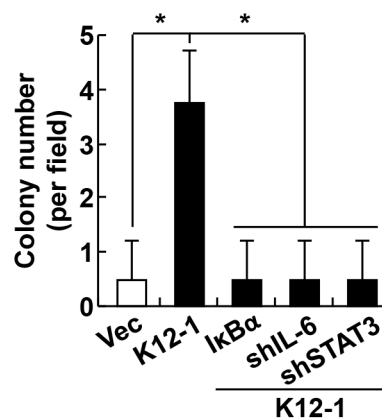

**Supplementary Figure S5: Colony numbers of the soft agar colony formation assays in Figure 3C.** Cell clusters of three or more cells are counted. Of note, in contrast to Rat-1 cells stably expressing miR-K12-1, which formed big colonies (Figure 3C), Rat-1 cells stably expressing an empty vector, or miR-K12-1 together with IkBa, IL-6 shRNA, or STAT3 shRNA only formed small cell clusters of no more than 4 cells.

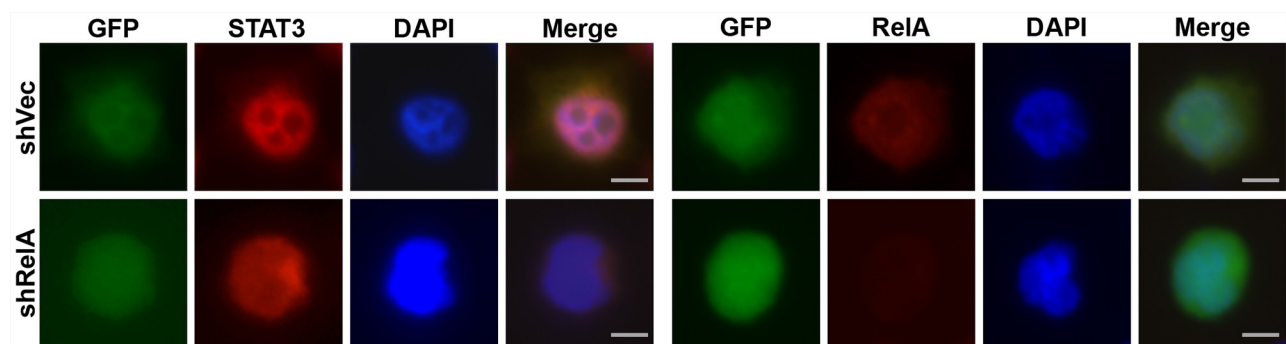

**Supplementary Figure S6: Knockdown of RelA inhibits nuclear expression of STAT3 in BCBL-1 cells.** Immunofluorescence assay was performed to examine the expression of STAT3 and RelA in BCBL-1 cells stably expressing RelA shRNA or scrambled control shRNA, together with GFP. Scale bar: 5  $\mu$ m.

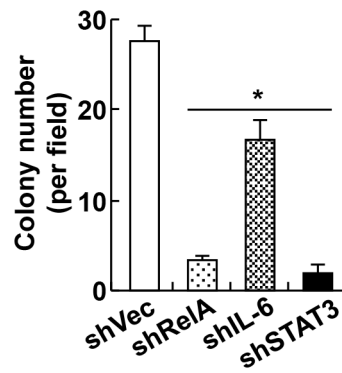

Supplementary Figure S7: Colony numbers of the soft agar colony formation assays in Figure 4E.

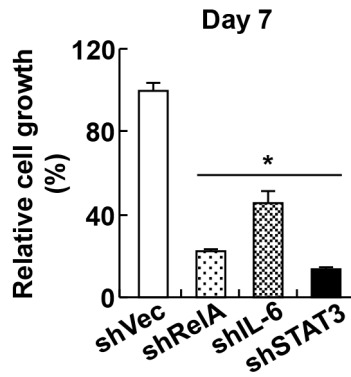

Supplementary Figure S8: Knockdown of RelA, Il-6 or STAT3 blocks BCBL-1 cell growth in cell culture.

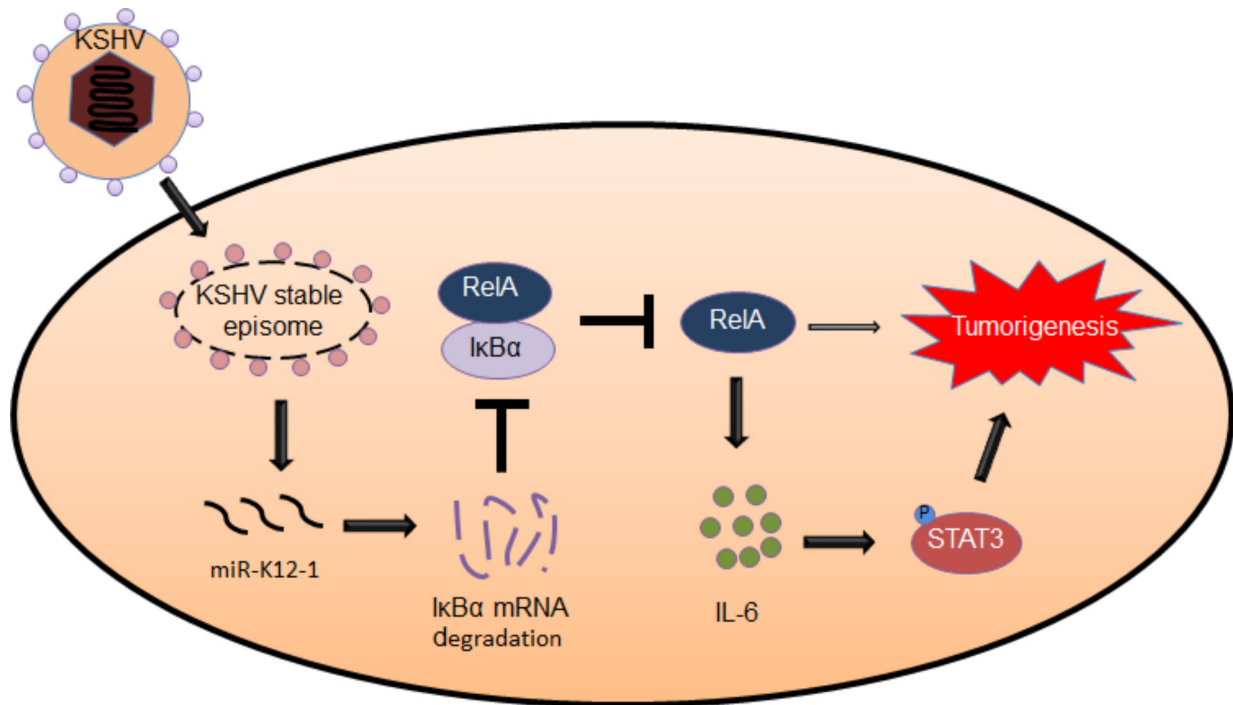

**Supplementary Figure S9: Modeling of miR-K12-1/IκBα/NF-κB/IL-6/STAT3 signaling in KSHV tumorigenesis.** NF-κB and STAT3 function as dimers but are indicated only by single protein.

**Supplementary Table S1: target sites of shRNAs**

| Gene        | Accession number | Target sequence       |
|-------------|------------------|-----------------------|
| Human RelA  | NM_021975.3      | GGACATATGAGACCTTCAAGA |
| Human IL-6  | NM_000600.3      | AGACATGTAACAAGAGTAA   |
| Human STAT3 | NM_139276.2      | GCACAATCTACGAAGAATCAA |
| Rat IL-6    | NM_012589.2      | GCTTCCAAACTGGATATAACC |
| Rat STAT3   | NM_012747.2      | GCTGCACCTGATCACCTTGA  |

Supplementary Table S2: primer pairs used for real-time PCR

| Gene                                   | Accession number | Primer pairs                                       |                          |
|----------------------------------------|------------------|----------------------------------------------------|--------------------------|
|                                        |                  | Forward (5' to 3')                                 | Reverse (5' to 3')       |
| GAPDH                                  | NM_002046.3      | CCGAGCCACATCGCTCAGACAC                             | GTGACCAGGCGCCAATACGAC    |
| IκBα                                   | NM_020529.2      | GGAGTACGAGCAGATGGTCAA                              | CCTTCACCTGGCGGATCAC      |
| IL-6                                   | NM_000600.3      | TAGTGAGGAACAAGCCAGAGC                              | TGGGTCAGGGGTGGTTATTG     |
| Survivin                               | NM_001168.2      | TGACGACCCCATAGAGGAACA                              | CGCACTTTCTCCGCAGTTTC     |
| Bcl-2                                  | NM_000633.2      | ATGTGTGTGGAGAGCGTCAACC                             | TGAGCAGAGTCTTCAGAGACAGCC |
| Bcl-xL                                 | NM_138578.1      | GAATGACCACCTAGAGCCTTGG                             | TGTTCCCATAGAGTTCCACAAAAG |
| Cyclin D1                              | NM_053056.2      | CCGTCCATGCGGAAGATC                                 | ATGGCCAGCGGGAAGAC        |
| STAT3                                  | NM_139276.2      | CTAGATCGGCTAGAAAACCTGGATAACGTC                     | ATGGGGTCCCCTTTGTAGGAAACT |
| RelA                                   | NM_021975.3      | CCAGACCAACAACAACCCCT                               | GATCTTGAGCTCGGCAGTGT     |
| U6 snRNA                               | X59362.1         | CTCGCTTCGGCAGCACA                                  | AACGCTTCACGAATTTGCGT     |
| miR-K12-1<br>reverse-<br>transcription |                  | GTCGTATCCAGTGCAGGGTCCGAGGTATTCGCACTGGATACGACGCTTAC |                          |
| miR-K12-1                              |                  | CGCGCATTACAGGAAACTGGG                              | GTGCAGGGTCCGAGGT         |
